# Supplementary material for: Sympathetic nervous system controls resolution of inflammation via regulation of repulsive guidance molecule A
Source: PubMed Central journal article supplement (PMC6367413; doi:10.1038/s41467-019-08328-5), 2019-02-07
Supplement: 41467_2019_8328_MOESM3_ESM.pdf [file 41467_2019_8328_MOESM3_ESM.pdf]

### **Description of Additional Supplementary Files**

**Supplementary Data1: Protein and phosphorylation profile of murine peritoneal monocytes.**
